# Supplementary material for: Non-iridescent structural color pigments from liquid marbles
Source: Royal Society of Chemistry journal article supplement (doi:10.1039/c5tc00644a), 2015-01-01
Supplement: c5tc00644a1.pdf [file c5tc00644a1.pdf]

## Supporting Information

### *Non-iridescent structural color pigments from liquid marbles*

Hongcheng Gu<sup>a</sup>, Baofen Ye<sup>a,c</sup>, Haibo Ding<sup>a</sup>, Chihui Liu<sup>a</sup>, Yuanjin Zhao<sup>\*a,b</sup>, Zhongze Gu<sup>\*a,b</sup>

<sup>a</sup> State Key Laboratory of Bioelectronics, Southeast University, Nanjing 210096, China. Email: gu@seu.edu.cn; yjzhao@seu.edu.cn

<sup>b</sup> Laboratory of Environment and Biosafety, Research Institute of Southeast University in Suzhou, Suzhou 215123, China

<sup>c</sup> Department of Analytical Chemistry, China Pharmaceutical University, Nanjing 210009, China

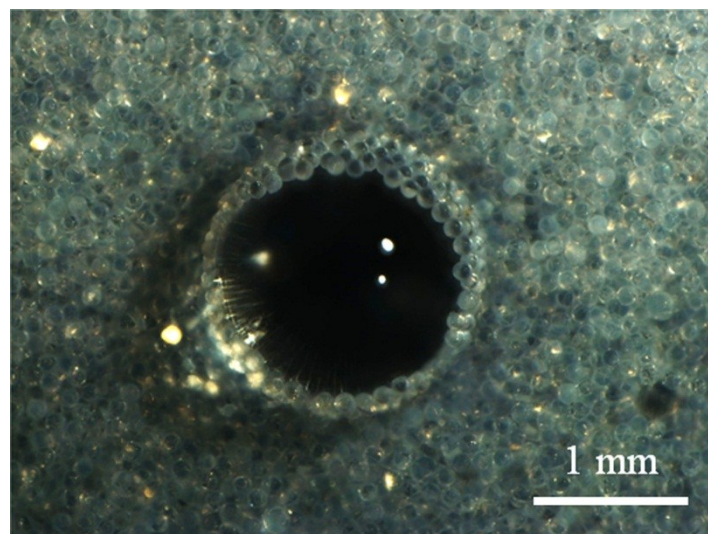

**Figure S1.** Photograph of a water drop on the ETPTA microparticles. The microparticles mainly decorated on the surfaces of the water drop.

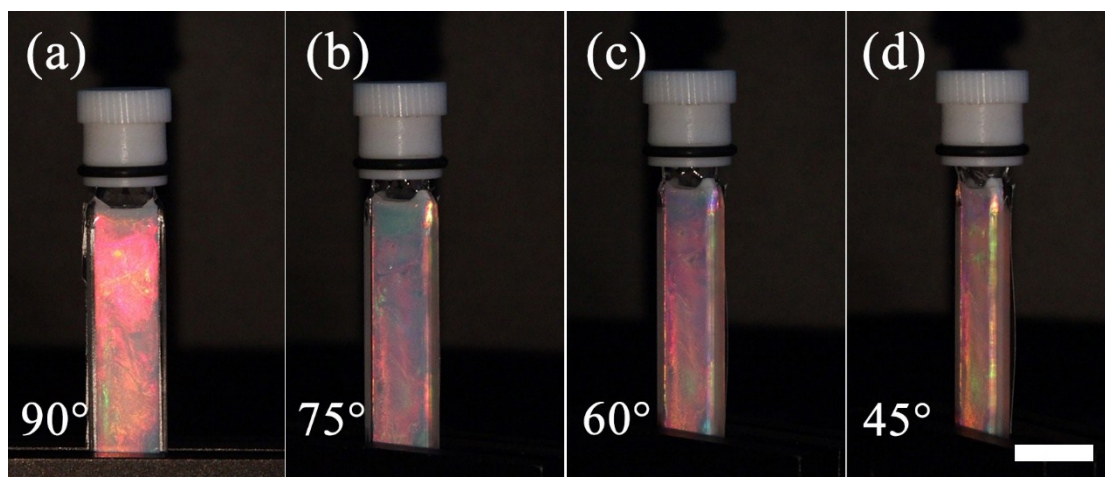

**Figure S2.** Photographs of the colloidal crystal array (CCA) dispersed PEGDA pre-gel solution viewed at different angles. The solution displayed iridescent colors.
